# Supplementary material for: Luminescent MoS2 Quantum Dots with Tunable Operating Potential for Energy-Enhanced Aqueous Supercapacitors
Source: PubMed Central journal article supplement — ACS Omega. 2021 Feb 11;6(7):4542–50. doi: 10.1021/acsomega.0c02576 (PMC7905822; doi:10.1021/acsomega.0c02576), 2021-02-11
Supplement: ao0c02576_si_001.pdf [file ao0c02576_si_001.pdf]

## Supporting Information

### **Luminescent MoS<sub>2</sub> Quantum Dots with Tunable Operating Potential for Energy Enhanced Aqueous Supercapacitors**

Sarojini Jeeva Panchu<sup>a, c</sup>, Kumar Raju<sup>b\*</sup>, Hendrik C. Swart<sup>c</sup>, Bharatiraja Chokkalingam<sup>d</sup>, Malik Maaza<sup>e</sup>, Mohamed Henini<sup>f</sup>, Mathew K. Moodley<sup>a\*</sup>

<sup>a</sup>Discipline of Physics, School of Chemistry and Physics, University of KwaZulu-Natal, Private Bag X54001, Durban, 4000, South Africa

<sup>b</sup>Energy Centre, Council for Scientific and Industrial Research (CSIR), Pretoria 0001, South Africa

<sup>c</sup>Department of Physics, University of the Free State, PO Box 339, Bloemfontein, 9300, South Africa

<sup>d</sup>Department of Electrical and Electronics Engineering, SRM Institute of Science and Technology, Kattankulathur, India

<sup>e</sup>Nanosciences African Network (NANOAFNET), iThemba LABS-National Research Foundation, 1 Old Faure Road, Somerset West 7129, PO Box 722, Somerset West, South Africa

<sup>f</sup>School of Physics and Astronomy, Nottingham Nanotechnology and Nanoscience Center University of Nottingham, NG7 2RD, United Kingdom

Corresponding Authors:

Dr. Mathew K. Moodley, Email: [Moodleymk@ukzn.ac.za](mailto:Moodleymk@ukzn.ac.za)

Dr. Kumar Raju, Email: [kraju@csir.co.za](mailto:kraju@csir.co.za)

**Table of contents****Page****Table S1****S2****Table S2****S3**

| <b>Comparing details</b>   | <b>Voltage (V)</b> | <b>Ampere (A)</b> | <b>Sheet Resistance (<math>R_{sh}</math>)/<math>\Omega</math></b> | <b>Resistivity <math>\rho</math>/ (<math>\Omega.cm</math>)</b> | <b>Conductivity <math>\sigma</math>/(<math>\Omega^{-1}.cm^{-1}</math>)</b> |
|----------------------------|--------------------|-------------------|-------------------------------------------------------------------|----------------------------------------------------------------|----------------------------------------------------------------------------|
| <b>MoS<sub>2</sub></b>     | 0.5                | 0.000021          | 107.601x10 <sup>3</sup>                                           | 1.076                                                          | 0.9294                                                                     |
| <b>MoS<sub>2</sub> NCs</b> | 0.5                | 0.00375           | 0.604x10 <sup>3</sup>                                             | 0.00604                                                        | 165.56                                                                     |
| <b>MoS<sub>2</sub> QDs</b> | 0.5                | 0.00608           | 0.373x10 <sup>3</sup>                                             | 0.00373                                                        | 268.46                                                                     |

**Table S1:** Comparison of electrical conductivity of MoS<sub>2</sub>, MoS<sub>2</sub> NCs and MoS<sub>2</sub> QDs

| <b>Electrode Material</b>                | <b>Energy density (Wh/kg)</b> | <b>Ref</b> |
|------------------------------------------|-------------------------------|------------|
| <b>Flower-like MoS<sub>2</sub></b>       | 8.59                          | 1          |
| <b>MoS<sub>2</sub> Nanospheres</b>       | 5.4                           | 2          |
| <b>MoS<sub>2</sub>/rGO</b>               | 6.2                           | 3          |
| <b>MoS<sub>2</sub>/carbon Nanosphere</b> | 7.4                           | 1          |

**Table S2:** The comparison of energy density with MoS<sub>2</sub> QDs with that of the reported values

### **References**

1. Khawula T.N.Y; Raju K., Franklyn P.J., Sigalas I., Ozoemena K.I, Symmetric pseudocapacitors based on molybdenum disulfide (MoS<sub>2</sub>)-modified carbon nanospheres: correlating physicochemistry and synergistic interaction on energy storage, *Journal of Materials Chemistry A*, 2016, 4, 6411-6425. <https://doi.org/10.1039/C6TA00114A>
2. Javed M.S.; Dai S., Wang M., Guo D., Chen L., Wang X., Hu C., Xi Y. High performance solid state flexible supercapacitor based on molybdenum sulfide hierarchical nanospheres, *Journal of Power Sources*, 2015, 285, 63-69. <https://doi.org/10.1016/j.jpowsour.2015.03.079>
3. Zhang Y.; Ju P., Zhao C., Qian X. In-situ Grown of MoS<sub>2</sub>/RGO/MoS<sub>2</sub>@Mo Nanocomposite and Its supercapacitor Performance, *Electrochimica Acta*, 2016, 219, 693-700. <https://doi.org/10.1016/j.electacta.2016.10.072>
